# Supplementary material
Source: PubMed Central journal article supplement (PMC3722046)
Supplement: NIHMS476563-supplement-1.pdf [file NIHMS476563-supplement-1.pdf]

Supplemental Data for:

**Ambient Fine Particulate Matter Alters Cerebral Hemodynamics in the Elderly**

Gregory A. Wellenius, ScD,<sup>1</sup> Luke D. Boyle,<sup>1,2</sup> Elissa H. Wilker, ScD,<sup>3</sup> Farzaneh A. Sorond, MD, PhD,<sup>4,5</sup> Brent A. Coull, PhD<sup>6</sup> Petros Koutrakis, PhD<sup>7</sup> Murray A. Mittleman, MD, DrPH<sup>3,7</sup> Lewis A. Lipsitz, MD<sup>5,9</sup>

From: <sup>1</sup>Department of Epidemiology, Brown University, Providence, RI; <sup>2</sup>Centre for Public Health, Queen's University Belfast, Belfast, UK; <sup>3</sup>Cardiovascular Epidemiology Research Unit, Department of Medicine, Beth Israel Deaconess Medical Center, Boston, MA; <sup>4</sup>Department of Neurology, Brigham and Women's Hospital, Boston, MA; <sup>5</sup>Institute for Aging Research, Hebrew SeniorLife, Boston, MA; <sup>6</sup>Department of Biostatistics, Harvard School of Public Health, Boston, MA; <sup>7</sup>Department of Environmental Health, Harvard School of Public Health, Boston, MA; and <sup>8</sup>Division of Gerontology, Beth Israel Deaconess Medical Center, Boston, MA.

Table S1: Association of blood flow velocity and cerebrovascular resistance with PM<sub>2.5</sub> levels averaged over the 28 days prior to evaluation, overall and stratified by participant characteristics.

| Participant Subgroup      | % Difference in Flow Velocity*<br>(95% CI) | P <sub>h</sub> | % Difference in Resistance*<br>(95% CI) | P <sub>h</sub> |
|---------------------------|--------------------------------------------|----------------|-----------------------------------------|----------------|
| Overall                   | -7.5 (-10.6, -4.2) <sup>†</sup>            |                | 8.6 (3.7, 13.8) <sup>†</sup>            |                |
| Sex                       |                                            |                |                                         |                |
| Female                    | -6.2 (-9.7, -2.6)                          | 0.078          | 7.0 (1.6, 12.6)                         | 0.14           |
| Male                      | -9.4 (-13.1, -5.6)                         |                | 11.3 (5.1, 17.8)                        |                |
| Hypertension Status       |                                            |                |                                         |                |
| Normotension              | -5.4 (-9.6, -1.0)                          | 0.13           | 5.6 (-0.8, 12.4)                        | 0.40           |
| Controlled Hypertension   | -7.6 (-11.2, -3.8)                         |                | 10.3 (4.5, 16.4)                        |                |
| Uncontrolled Hypertension | -10.7 (-15.1, -6.0)                        |                | 9.4 (2.1, 17.3)                         |                |
| Diabetes                  |                                            |                |                                         |                |
| No                        | -7.6 (-10.8, -4.2)                         | 0.86           | 8.4 (3.3, 13.8)                         | 0.75           |
| Yes                       | -7.1 (-12.0, -1.9)                         |                | 9.6 (1.8, 18.1)                         |                |
| Obesity                   |                                            |                |                                         |                |
| BMI<30                    | -7.5 (-10.8, -4.0)                         | 0.99           | 9.5 (4.2, 15.1)                         | 0.34           |
| BMI≥30                    | -7.5 (-11.7, -3.0)                         |                | 6.3 (-0.4, 13.4)                        |                |
| Season                    |                                            |                |                                         |                |
| Cool                      | -10.6 (-14.7, -6.2)                        | 0.084          | 8.2 (1.3, 15.5)                         | 0.81           |
| Warm                      | -5.1 (-9.6, -0.4)                          |                | 9.4 (2.4, 16.9)                         |                |

\*Estimates represent the percent difference in each outcome per interquartile range increase in PM<sub>2.5</sub> levels. <sup>†</sup>:p<0.05. BMI: body mass index. IQR: interquartile range. P<sub>h</sub>: P-value from test for homogeneity.

Table S2: Association between cerebral vasoreactivity and PM<sub>2.5</sub> levels averaged 1 to 28 days prior to assessment.

| PM <sub>2.5</sub> Averaging Period (Days) | IQR (µg/m <sup>3</sup> ) | Difference in Cerebral Vasoreactivity* (95% CI) |
|-------------------------------------------|--------------------------|-------------------------------------------------|
| 1                                         | 4.8                      | 3.0 (-0.8, 6.9)                                 |
| 3                                         | 4.4                      | 0.9 (-3.7, 5.5)                                 |
| 5                                         | 3.9                      | 0.0 (-4.7, 4.7)                                 |
| 7                                         | 3.8                      | -0.3 (-5.5, 4.8)                                |
| 14                                        | 3.4                      | -0.6 (-6.1, 4.8)                                |
| 21                                        | 3.2                      | -2.8 (-8.7, 3.1)                                |
| 28                                        | 3.0                      | -1.5 (-7.7, 4.7)                                |

\*Change in cerebral vasoreactivity is expressed in units of (100 cm/s)/mmHg per interquartile range increase in PM<sub>2.5</sub>. IQR: interquartile range.
